# Supplementary material for: Synthesis of 1,8-naphthalimide-based probes with fluorescent switch triggered by flufenamic acid
Source: PubMed Central journal article supplement (PMC6030310; doi:10.1098/rsos.172137), 2018-06-20
Supplement: rsos172137supp1.pdf [file rsos172137supp1.pdf]

# Flufenamic acid as a trigger of 1,8-naphthalimide based fluorescent switches

G. Saito<sup>1</sup>, D. Velluto<sup>1,2</sup> and M. Resmini<sup>1\*</sup>

<sup>1</sup>Department of Chemistry and Biochemistry, SBCS, Queen Mary University of London, E1 4NS, London, UK

<sup>2</sup>Diabetes Research Institute and Cell Transplant Center – University of Miami Leonard M. Miller School of Medicine, Miami, FL 33136, USA

## SUPPORTING INFORMATION

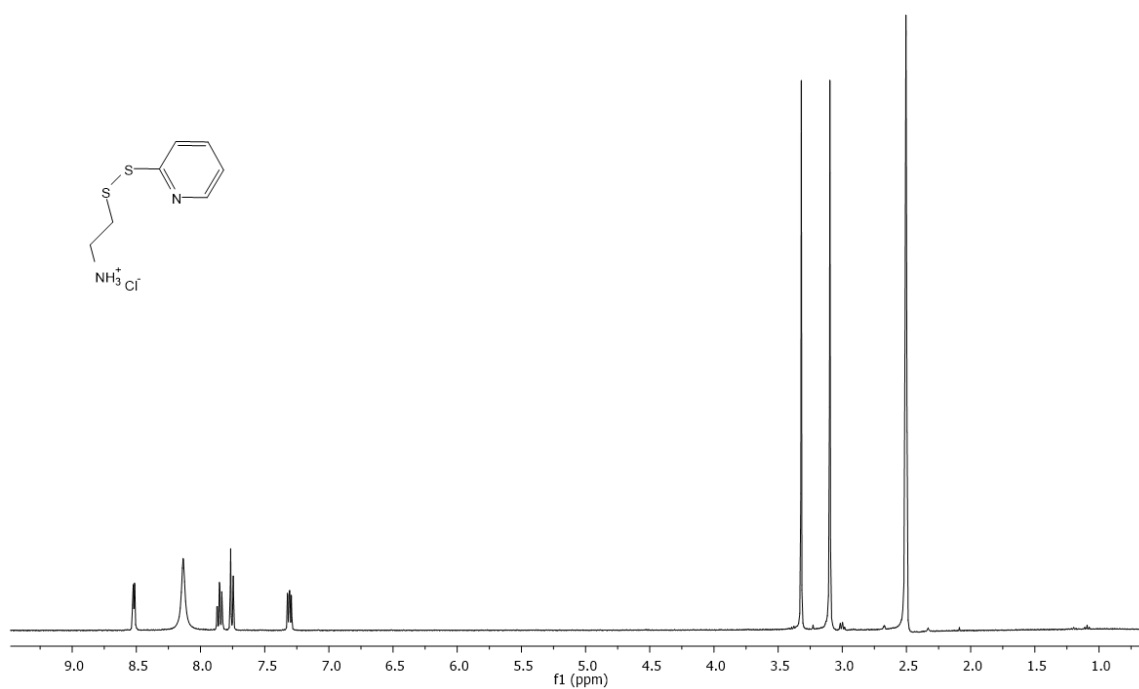

Figure S1. <sup>1</sup>H-NMR of product 5 in DMSO-d<sub>6</sub>.

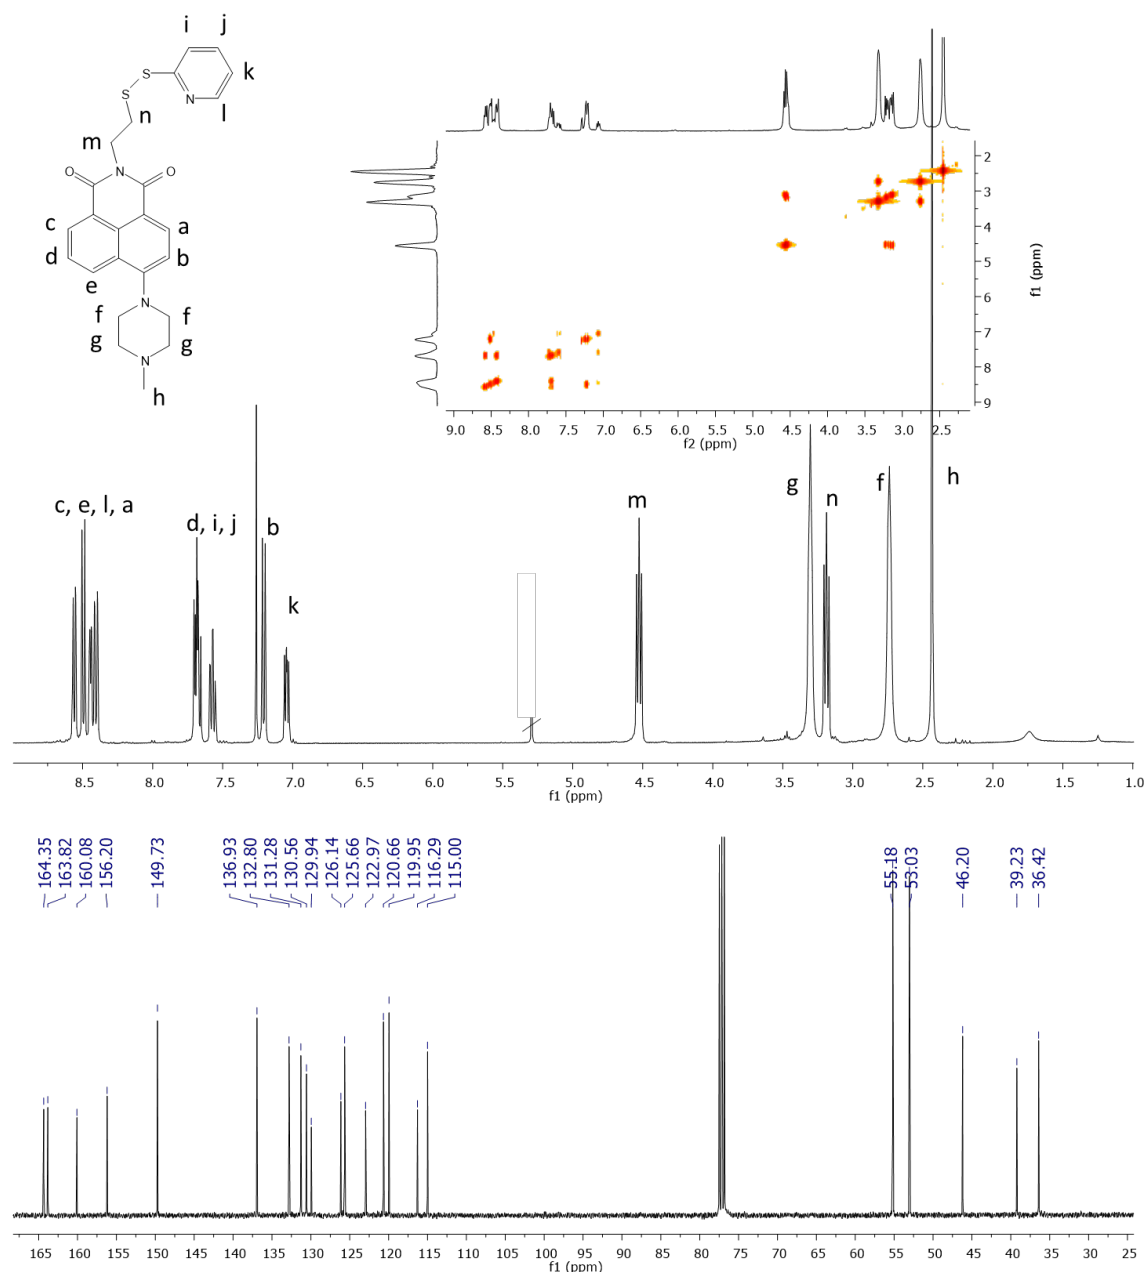

**Figure S2.**  $^1\text{H}$ -NMR, COSY and  $^{13}\text{C}$ -NMR of probe 1 in  $\text{CDCl}_3$ .

Probe 1 - Product B (figure S3): 6-(4-methylpiperazin-1-yl)-2-(2-ylidysulfanyl)ethyl)-1H-benzo[de]isoquinoline-1,3(2H)-dione:  $^1\text{H}$ -NMR (400 MHz,  $\text{CDCl}_3$ ):  $\delta$  8.53 (1H, dd,  $J=0.8$ , 7.2), 8.47 (1H, d,  $J=8$ ), 8.38 (1H, dd,  $J=0.8$ , 8.4), 7.65 (1H, dd,  $J=7.2$ , 8.0), 7.18 (1H, d,  $J=8$ ), 4.53 (2H, t,  $J=7.2$ ), 7.28 (4H, s), 3.11 (2H, t,  $J=7.2$ ), 2.73 (4H, s), 2.43 (3H, s).  $^{13}\text{C}$  NMR (100 MHz,  $\text{CDCl}_3$ )  $\delta$  164.46 (s), 163.94 (s), 156.16 (s), 132.81 (s), 131.32 (s), 130.51 (s), 130.06 (s), 126.26 (s), 125.71 (s), 123.21 (s), 116.61 (s), 115.07 (s), 55.28 (s, 2C), 53.11 (s, 2C), 46.27 (s), 39.62 (s), 35.85 (s). FT-IR:  $\text{cm}^{-1}$  2792.8 (-C-H Al), 1651.5 (-N-C=O), 1590.2 (-C=C- Ar), 1141 (C-N), 707 (-CH<sub>2</sub>-S). Melting point range 231-233  $^\circ\text{C}$ .

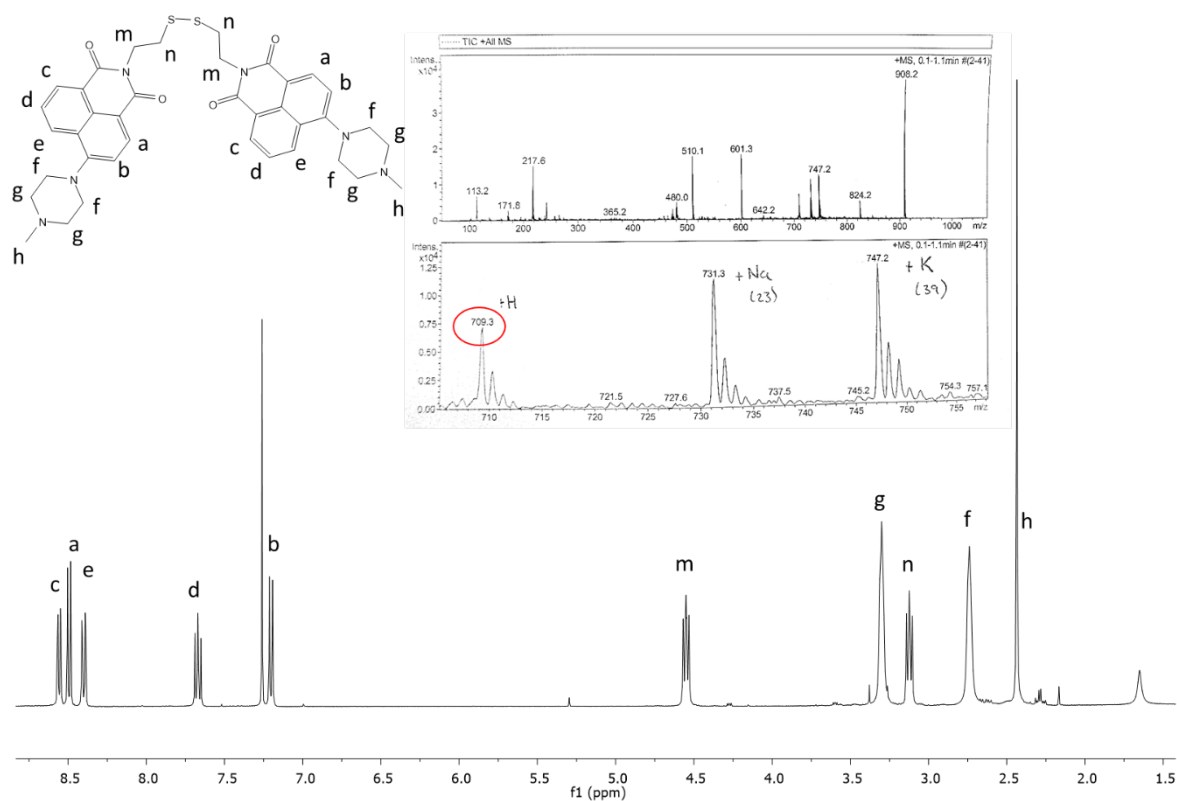

Figure S3. <sup>1</sup>H-NMR of dimer of probe 1 in CDCl<sub>3</sub> and LC-MS spectrum, showing the peak of the dimer at 708 M/z.

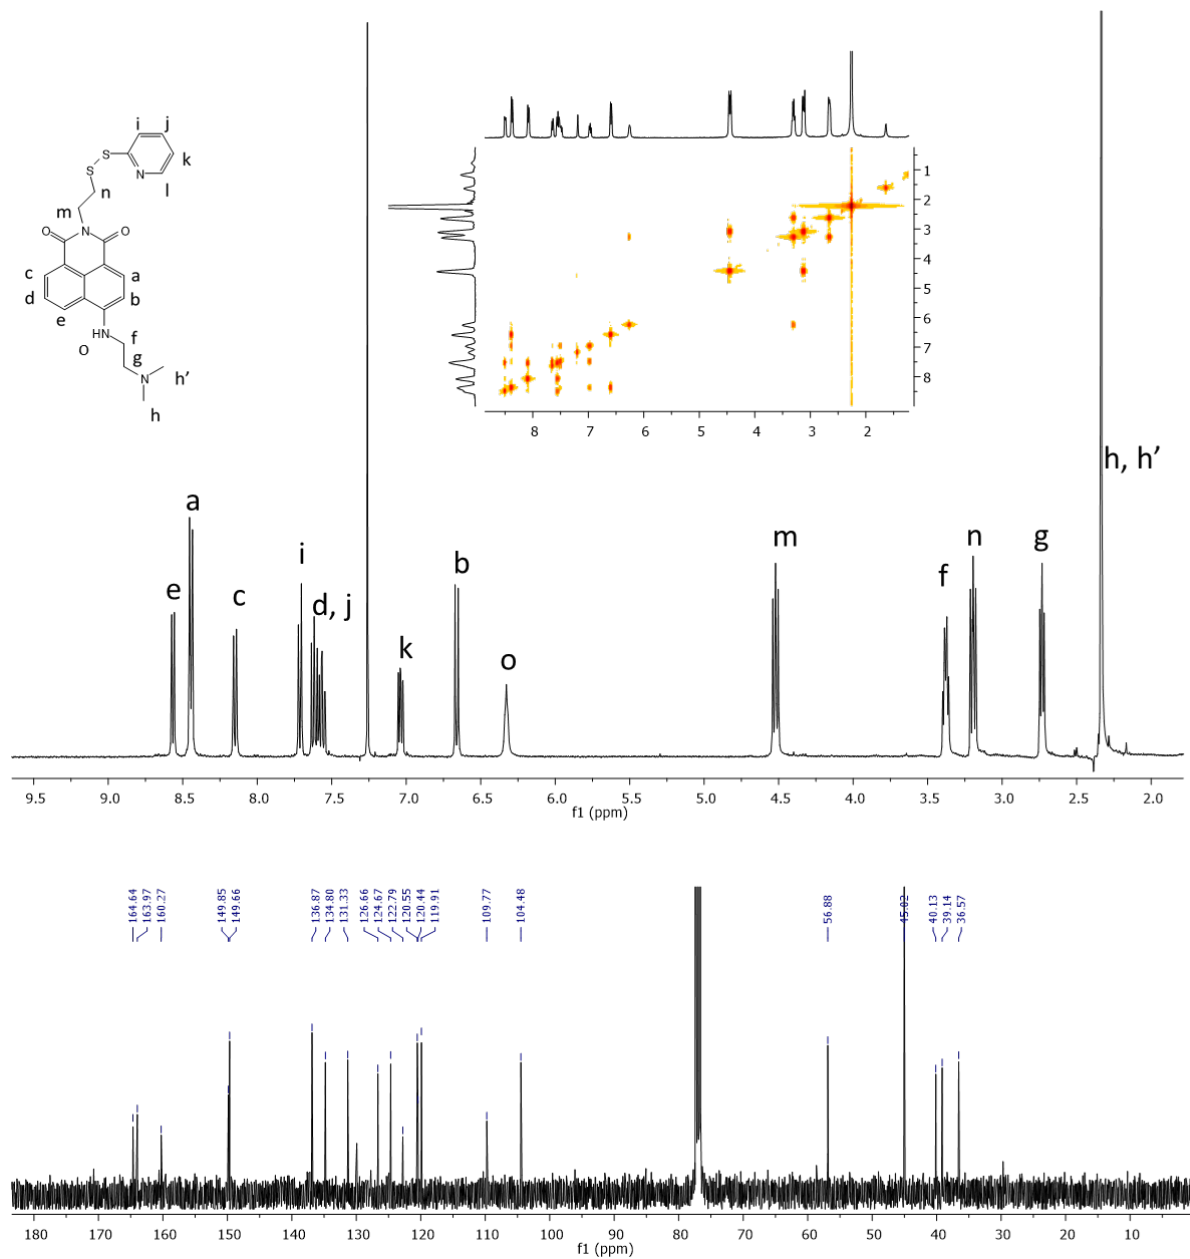

Figure S4. <sup>1</sup>H-NMR, COSY and <sup>13</sup>C-NMR of probe 2 in CDCl<sub>3</sub>.

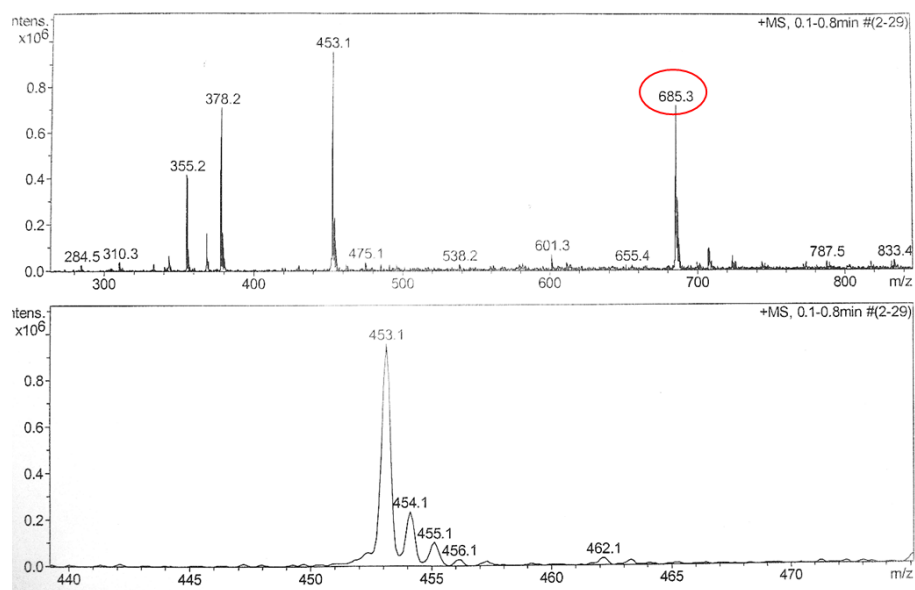

Figure S5. LC-MS of dimer of probe 2.

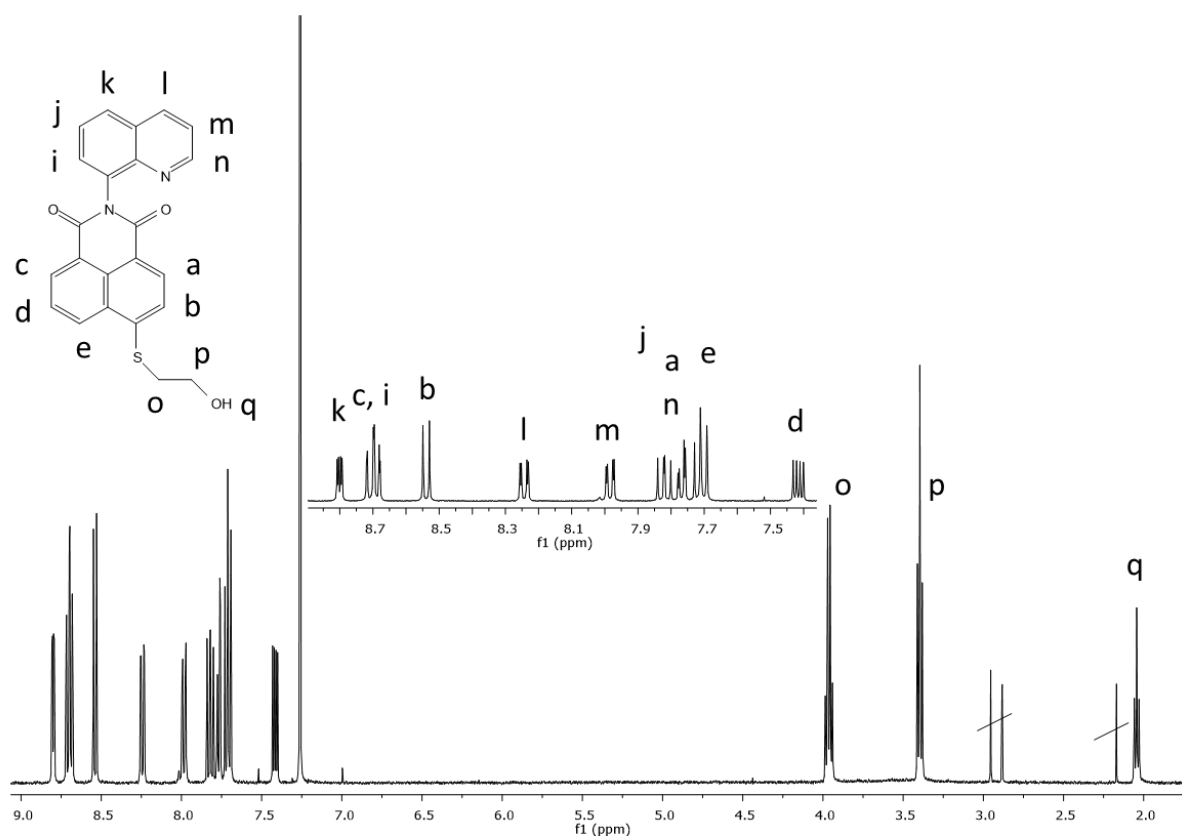

Figure S6. <sup>1</sup>H-NMR of probe 3 in CDCl<sub>3</sub>.

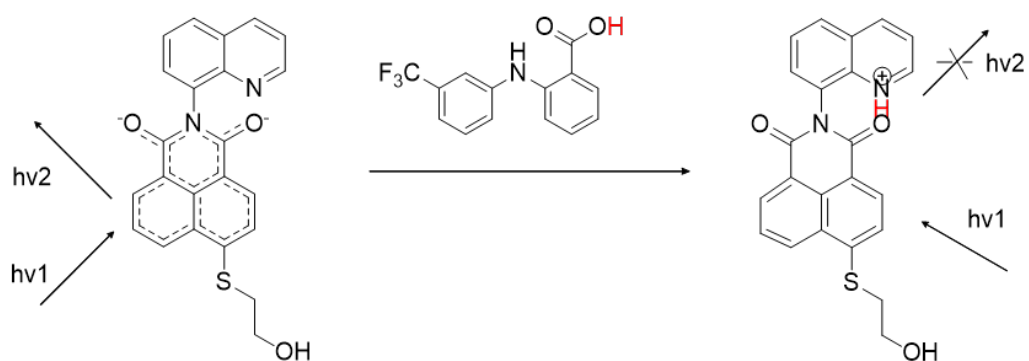

Figure S7. Proposed mechanism for fluorescence quenching (probe 3)

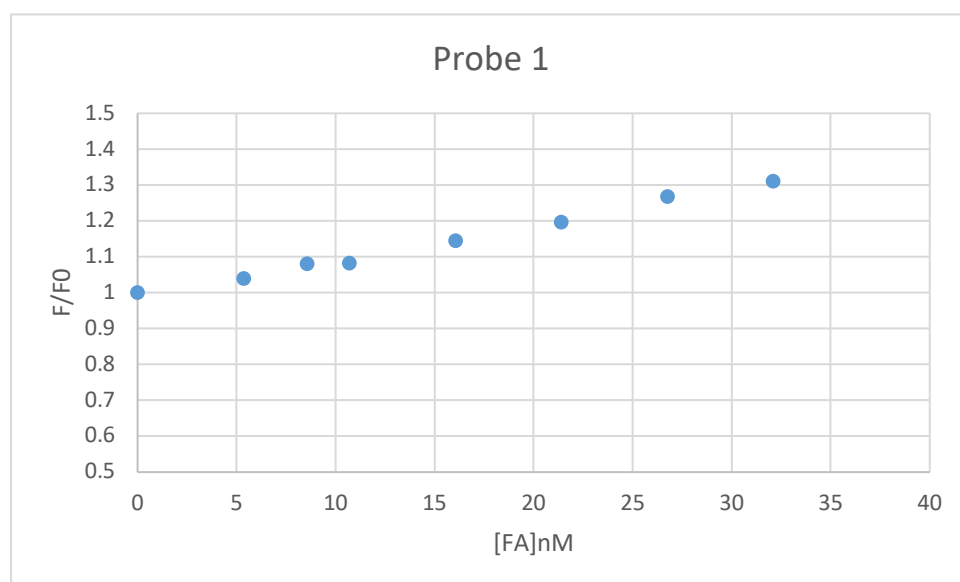

Figure S8. Probe 1: plot of  $F/F_0$  vs  $[FA]$  that show a linear correlation and no evidence of saturation
